# Supplementary material for: Revealing the neural fingerprints of a missing hand
Source: eLife. 2016 Aug 23;5:e15292. doi: 10.7554/eLife.15292 (PMC5040556; doi:10.7554/eLife.15292)
Supplement: Figure 1—source data 1. — To measure phantom sensations, as well as other demographic and clinical details of potential relevance to the studied missing hand representation, amputees completed a range of questionnaires (e.g. amputation details, prosthesis usage etc.). Amputees rated intensities of phantom/stump pain and non-painful phantom sensations (vividness), using a 0 – 100 scale, as follows: (i) intensity of worst pain/vivid sensation experienced during the last week (or in a typical week involving such sensations); (ii) intensity of phantom pain on average over the last week (or in a typical week if last week was atypical); and (iii) current intensity/vividness of phantom pain and sensations, during the scanning day. Phantom limb pain magnitude was calculated by dividing worst pain intensity by pain frequency (1- all the time; 2- daily; 3- weekly). An analogous measure was obtained for vividness of non-painful phantom sensations. This approach represented the chronic aspect of the phantom pain/sensation as it combines frequency and intensity (Makin et al., 2013a). We also asked the amputees whether they experienced telescoping, a common phenomenon where the perceived length of the phantom limb is changed (Flor and Nikolajsen, 2006). Amp. = amputation; Amp. level = amputation level measured in percentages: (residual arm length/intact arm length) x 100. Intact arm length is measured from shoulder to fingertips, where 41% is equivalent to the level of the elbow and 75% is equivalent to the level of the wrist; PLS = phantom limb sensations; mag. = magnitude; scan = score of sensation phantom limb vividness/pain intensity on scanning day (scale 0 – 100); PLP = phantom limb pain; ave. = score of average phantom limb pain in a typical week (scale 0 – 100); prosthetics usage = prosthetic limb usage (frequency): 0- never, 1- rarely, 2- occasionally, 3- daily, 4- more than 4 hours a day, 5- more than 8 hours a day; Y. = yes; N. = no. DOI: http://dx.doi.org/10.7554/eLife.15292.004 [file elife-15292-fig1-data1.xlsx]

## Sheet: Sheet1
	Age	Time since amp.	Amp. level	PLS mag./scan	PLP mag./scan/ave.	Stump pain scan	Cosmetic/ functional prosthetics usage	Telescoping	Brachial plexus injury
Above elbow	53	31	0.35	100/100	15/0/	0	2/2	Y	N
					20
Below elbow	48	25	0.7	80/20	35/0/30	0	3/5	N	N
Brachial Plexus	50	31	0.3	70/70	50/10/40	0	5/2	Y	Y
