# Supplementary material for: Revealing the neural fingerprints of a missing hand
Source: eLife. 2016 Aug 23;5:e15292. doi: 10.7554/eLife.15292 (PMC5040556; doi:10.7554/eLife.15292)
Supplement: Figure 1—source data 2. — Amputees were asked to rate how vivid the phantom movement felt (PDS = phantom digit sensation; scale 0 – 100; ranging from unable to feel movement to movement is felt as vividly as the sensation of movement elicited by the intact hand digits). In addition, amputees were asked to rate how difficult it was to perform each phantom digit movement (diff. = difficulty; scale 0 – 100; ranging from easy to impossible). Finally, participants were asked to rate the quality and extent of movement afforded by each phantom digit. Amputees’ answers were standardised as follows: 1- full range of movements (i.e. equivalent to movements with the homologous digit on the intact hand). 2– near to full range of movement (i.e. similar to movement of the intact hand, though reduced). 3– noticeably less range of movement compared to the intact hand (i.e. partial finger flexion and extension movement). DOI: http://dx.doi.org/10.7554/eLife.15292.005 [file elife-15292-fig1-data2.xlsx]

## Sheet: Sheet1
	Digit 1 PDS/diff./ quality	Digit 2 PDS/diff./ quality	Digit 3 PDS/diff./ quality	Digit 4 PDS/diff./ quality	Digit 5 PDS/diff./ quality
Above elbow	100/0/1	100/10/2	70/50/3	90/10/2	90/0/3
Below elbow	60/40/2	50/30/1	40/50/1	50/50/1	60/30/1
Brachial plexus	80/10/1	70/30/2	50/70/2	40/60/1	80/20/1
